# Supplementary material
Source: PubMed Central journal article supplement (PMC4951797)

## Supporting Information

**Hop (*Humulus lupulus L.*) extract and 6-prenylnaringenin induce P450 1A1 catalyzed  
estrogen 2-hydroxylation**

*Shuai Wang, Tareisha L. Dunlap, Caitlin E. Howell, Obinna C. Mbachu, Emily A. Rue, Rasika  
Phansalkar, Shao-Nong Chen, Guido F. Pauli, Birgit M. Dietz, and Judy L. Bolton\**

Department of Medicinal Chemistry and Pharmacognosy, UIC/NIH Center for Botanical Dietary  
Supplements Research, University of Illinois at Chicago, 833 South Wood Street, Chicago,  
Illinois 60612-7231, USA

\*Correspondence:

Dr. Judy L. Bolton

Department of Medicinal Chemistry and Pharmacognosy

University of Illinois at Chicago

833 S. Wood Street, M/C 781

Chicago, IL, 60612-7231

Email: [Judy.Bolton@uic.edu](mailto:Judy.Bolton@uic.edu)

Phone: 312-996-5280

Fax: 312-996-7107

**Table S1. Inhibition of recombinant P450 1A1/1B1 enzymes with hop compounds.<sup>a</sup>**

|          | <b>apparent Ki (<math>\mu</math>M)</b> |                 |                 |                 |
|----------|----------------------------------------|-----------------|-----------------|-----------------|
|          | <b>6-PN</b>                            | <b>8-PN</b>     | <b>IX</b>       | <b>XH</b>       |
| P450 1A1 | 0.59 $\pm$ 0.10                        | 0.20 $\pm$ 0.06 | 1.6 $\pm$ 0.53  | 0.11 $\pm$ 0.04 |
| P450 1B1 | 0.23 $\pm$ 0.02                        | 0.17 $\pm$ 0.04 | 0.54 $\pm$ 0.11 | 0.17 $\pm$ 0.02 |

<sup>a</sup>The apparent Ki (Ki') values are expressed as means  $\pm$  SD from three independent dose-responsive curves using recombinant P450 1A1 and P450 1B1 enzymes.

## Figure Legends

**Figure S1. Hop compounds partially contribute to the activity of hops extract for up-regulation of P450 1A1/1B1 activity.** MCF-7 cells were treated with hops extract (2.5 µg/ml) as well as the four marker hop compounds at the equivalent amount to those present in the extract, individually and as a mixture (6-PN 0.084 µM, 8-PN 0.024 µM, IX 0.070 µM, and XH 2.3 µM) for 48 h. Cells were then measured for EROD activity as previously described and the results were analyzed by one-way ANOVA for comparison of treatment groups with control, \*  $p < 0.05$ .

**Figure S2. Hop compounds inhibited human recombinant P450 1A1 and 1B1 activity.** Human recombinant P450 1A1 and P450 1B1 protein with reductase were incubated with 7-ethoxyresorufin, NADPH and different doses of A) XH, B) IX, C) 8-PN and D) 6-PN at 37°C for 20 min. EROD activity was measured and data were plotted as percentage of activity against vehicle control.

**Figure S3. Hop compounds moderately inhibited CYP1 activity in cells.** MCF-7 cells were pretreated with TCDD (10 nM) for 48 h and pre-incubated with 6-PN/8-PN/IX/XH (0.1 µM, 1 µM, and 10 µM) for 5 min at 37°C before ethoxyresorufin and NADPH was added for 20 min. EROD activity was measured and results were analyzed by one-way ANOVA with Dunnett's multiple comparison post-test, \*  $p < 0.05$ .

**Figure S4. COMT mRNA expression was not affected by hop compounds in MCF-10A cells.** COMT mRNA expression were analyzed after 24 h via qPCR in MCF-10A cells treated with DMSO control, 6-PN, 8-PN, IX, XH (1 µM), and TCDD (10 nM). Results are the means  $\pm$  SEM of three independent experiments.

**Figure S5. 6-PN dose-responsively and preferentially increased estrogen 2-hydroxylation in MCF-10A cells.** MCF-10A cells were treated with the hop marker

compounds in the presence of E<sub>2</sub> (1 μM) for 2 days and media were analyzed for 2-MeOE<sub>1</sub> and 4-MeOE<sub>1</sub> metabolites. Results were normalized to fold induction against estradiol treated cells. Data were plotted as the means ± SEM and analyzed by one-way ANOVA with Dunnett's multiple comparison post-test to compare treatment groups with control group, \*p < 0.05.

**Figure S6. MCF-7 cells had significant higher response than MCF-10A cells to TCDD induced EROD activity.** MCF-10A and MCF-7 cells were treated with TCDD (10 nM) for 48 h. Cells were then measured for EROD activity as previously described.

**Figure S7. HepG2 cells had significantly higher response than MCF-7 cells to TCDD induced XRE-luciferase activity.** MCF-7 cells and HepG2 cells were treated with TCDD (10 nM) after transfection for 24 h. Cells were then lysed and measured for luciferase as previously described.

**Figure S8. TCDD induced EROD activity was highest after 2 days of treatment.** MCF-7 cells were treated with TCDD (10 nM) for 1 day, 2 day and 3 days. Cells were then measured for EROD activity as previously described.

# Figures

Figure S1

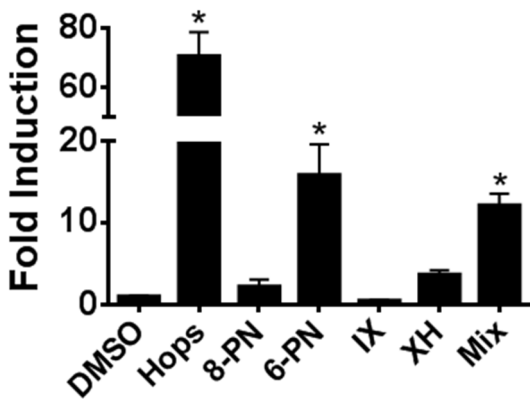

Figure S2

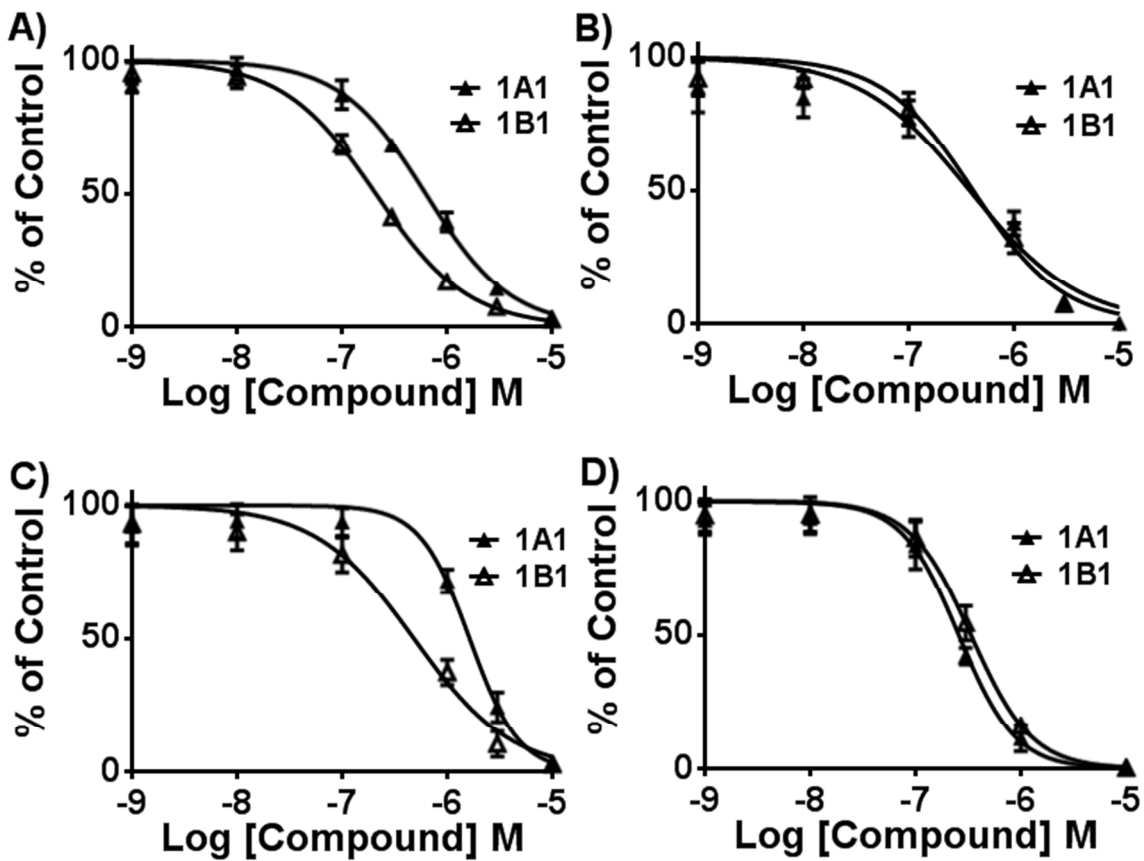

Figure S3

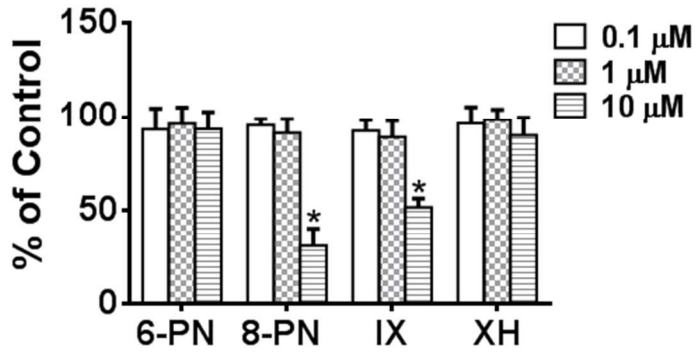

Figure S4

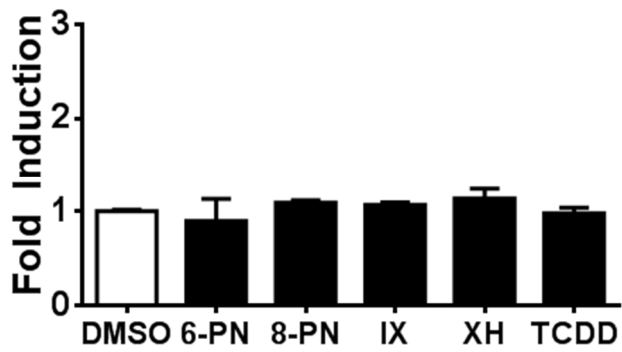

Figure S5

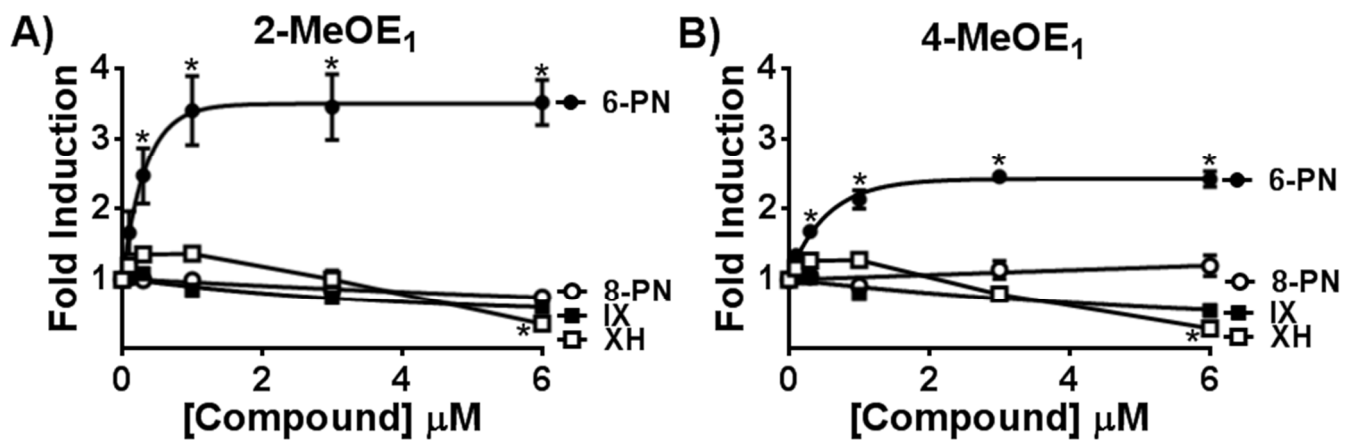

Figure S6

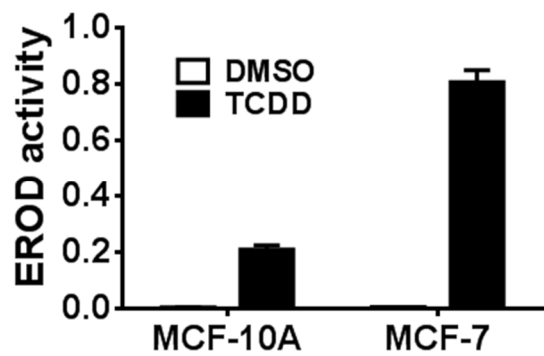

Figure S7

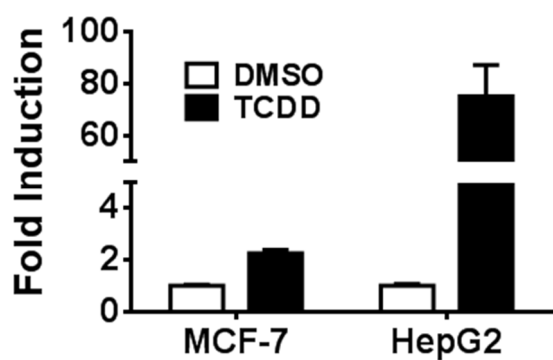

Figure S8

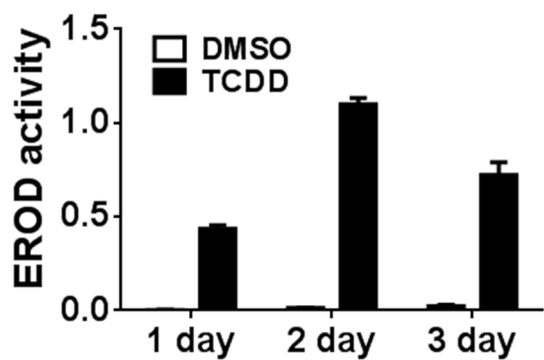

Supplement: tx6b00112_si_001.pdf [file tx6b00112_si_001.pdf]
